# Supplementary material for: Specific microRNAs are involved in the reno-protective effects of sevoflurane preconditioning and ischemic preconditioning against ischemia reperfusion injury in rats
Source: PubMed Central journal article supplement — Int J Mol Med. 2020 Jan 27;45(4):1141–9. doi: 10.3892/ijmm.2020.4477 (PMC7053861; doi:10.3892/ijmm.2020.4477), 2020-01-27

Figure S1. Full length blots of the target substances. APC, anesthetic preconditioning; IPC, ischemic preconditioning; IRI, ischemia reperfusion injury; PC, positive control; pAkt, phosphorylated protein kinase B; PTEN, phosphatase and tensin homologue deleted from chromosome 10.

Full length blots of the target substances

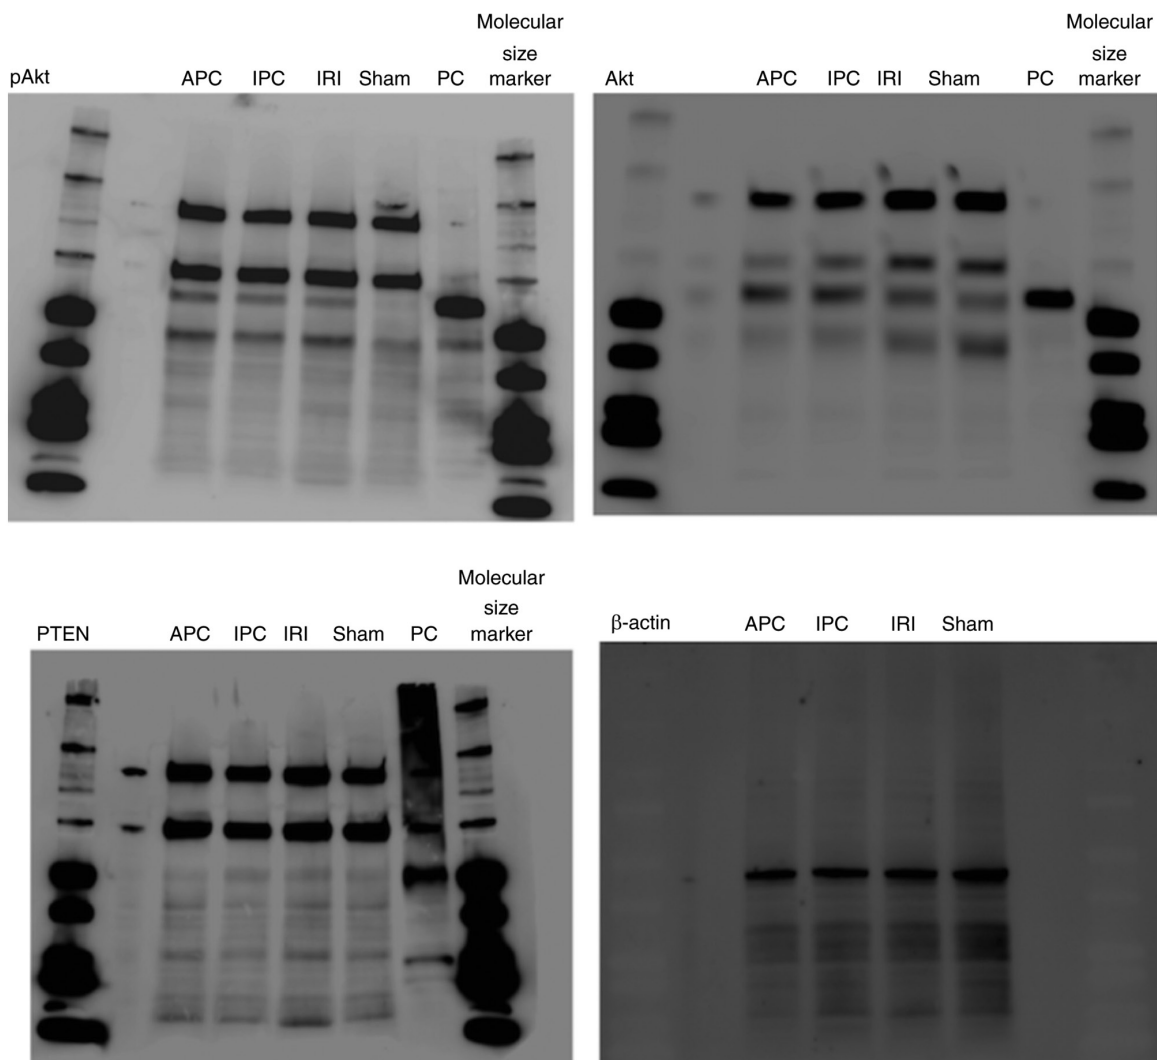

Supplement: Supplementary_Data.pdf [file Supplementary_Data.pdf]
